# Supplementary material
Source: MDPI journal article supplement (https://www.mdpi.com/1424-8220/11/8/8180)
Supplement: s1 [file s1]

*Correction*

## **Correction: Ngo, T.D. LinkMind: Link Optimization in Swarming Mobile Sensor Networks. *Sensors* 2011, 8, 8180-8202**

**Trung Dung Ngo**<sup>1,2,\*</sup>

<sup>1</sup> The More-Than-One Robotics lab, Department of Electronic Systems, Automation and Control Section, Aalborg University, Fredrik Bajers Vej 7C, 9220 Aalborg, Denmark

<sup>2</sup> Faculty of Science, University of Brunei Darussalam, Jalan Tungku Link, Gadong, BE1410, Brunei

\* Author to whom correspondence should be addressed; E-Mail: [dungnt@es.aau.dk](mailto:dungnt@es.aau.dk); Tel.: +45 9940 8744; Fax: +45 9940 8772.

*Received: 25 October 2011 / Published: 26 October 2011*

---

The author's affiliation was wrong in [1]. The "National University of Brunei" should be "University of Brunei Darussalam".

### **References**

1. Ngo, T.D. LinkMind: Link Optimization in Swarming Mobile Sensor Networks. *Sensors* **2011**, *8*, 8180-8202.

© 2011 by the authors; licensee MDPI, Basel, Switzerland. This article is an open access article distributed under the terms and conditions of the Creative Commons Attribution license (<http://creativecommons.org/licenses/by/3.0/>).
